# Supplementary material for: Association of primary and community care services with emergency visits and hospital admissions at the end of life in people with cancer: a retrospective cohort study
Source: HighWire-hosted journal article supplement (doi:10.1136/bmjopen-2021-054281), 2022-02-01
Supplement: bmjopen-2021-054281supp001_data_supplement.pdf [file bmjopen-2021-054281supp001_data_supplement.pdf]

## Supplementary material

Figure S1. Flowchart of the data management

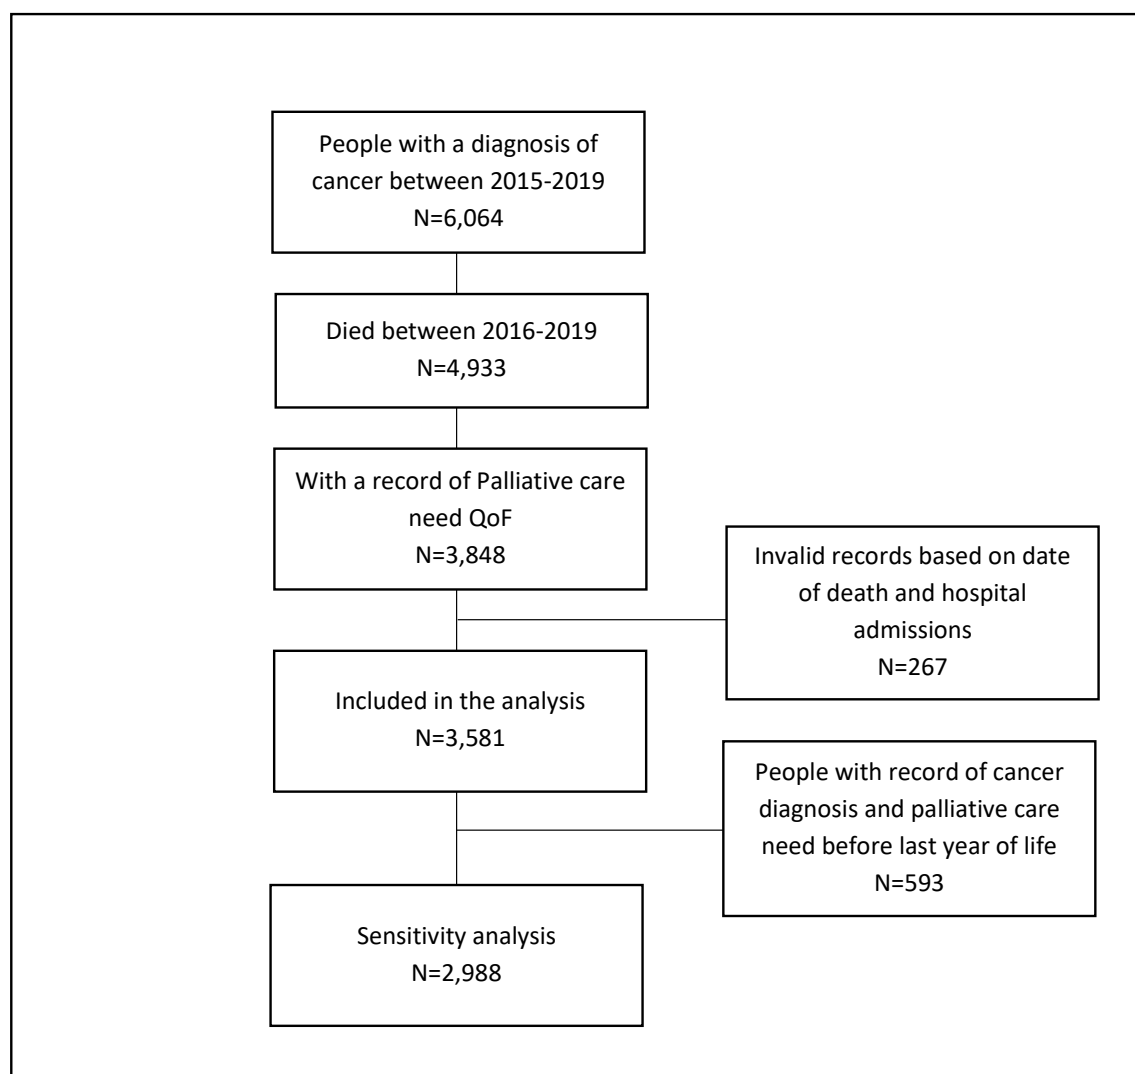

**Box S1. List of Read codes and ICD-10 codes used to identify the cohort and variables.**

|                                           | Read Codes v2                                                                                                                                                                                                                                                                                                                                                               | ICD10 codes                                                                                                      |
|-------------------------------------------|-----------------------------------------------------------------------------------------------------------------------------------------------------------------------------------------------------------------------------------------------------------------------------------------------------------------------------------------------------------------------------|------------------------------------------------------------------------------------------------------------------|
| Diagnosis of cancer                       | B0%, B1%, B2%, B3%, B4%, B5%, B6%, Byu%, K1323, K01w1, 68W24, C184., NOT(B677.)                                                                                                                                                                                                                                                                                             | C00 to C97                                                                                                       |
| Type of cancer                            | Lung cancer B22%<br>Bowel cancer B12% to B14%<br>Prostate cancer B45%<br>Breast cancer B34% to B35%<br>Pancreas cancer B17%<br>Haematological cancer B61% to B62% and B64% to B69%                                                                                                                                                                                          | C34.0 to C34.9<br>C17.0 to C21.8<br>C61<br>C50.0 to C50.9<br>C25.0 to C25.9<br>C81.0 to C86.6 and C91.0 to C95.9 |
| Date of death                             | 22J., 9491., 9495., 94G., 8HG., 9493., 94E., 946., 94Z., ZV680, 94., 949A., 949., 9431., 9442., 9451., 9452., 9453., 946., 9492., 9494., 9496., 9497., 9498., 9499., 949B., 949C., 949D., 949E., 949F., 949G., 949H., 949J., 949Z., 94D., 94G..                                                                                                                             |                                                                                                                  |
| Palliative care QoF                       | 1Z01., 2JE., 2Jf., 38VY., 38Vb., 38Vd., 38Ve., 38Vf., 38Vg., 38Vh., 38Vi., 8BA2., 8BAP., 8BAS., 8BAT., 8BAe., 8BJ1., 8CM1.% (NOT 8CM15), 8CM4., 8CME., 8CMj., 8CMk., 8H6A., 8H7L., 8H7g., 8HH7., 8IEE., 9EB5., 9Ng7., ZV57C, 8CMQ., 9NgD., 9G8., 9c0P., 9c0N., 8CMW3, 9K9., 9367., 9c0L0, 9c0M., 9NNd., 8CMb., 8B2a., 9NNf0, 38QH., 38QK., 8CMg., 2Jg., 9NNq., 9NNr., 9NNs. |                                                                                                                  |
| Quality of Outcomes Framework (QoF) Rules |                                                                                                                                                                                                                                                                                                                                                                             |                                                                                                                  |
| Asthma                                    | H33%, H3120, H3B., 173A., NOT (H333., 21262, 212G.)                                                                                                                                                                                                                                                                                                                         |                                                                                                                  |
| Atrial Fibrillation                       | G573% NOT (212R.)                                                                                                                                                                                                                                                                                                                                                           |                                                                                                                  |
| Hypertension                              | G2., G20%, Gyu2., Gyu20, G24.-G2z., NOT (G24z1, G2400, G2410, G27.)                                                                                                                                                                                                                                                                                                         |                                                                                                                  |
| Diabetes                                  | C10., C109J, C109K, C10C., C10D., PKyP., C10Q., C10E%, C10F%, C10H%, C10M%, C10N%, C10P% NOT(C10F8)                                                                                                                                                                                                                                                                         |                                                                                                                  |
| Congestive heart disease                  | G3...G309., G30B.-G330z, G33z.-G3401, G342.-G35X., G38.-G3z., Gyu3%, NOT(Gyu31, G310.)                                                                                                                                                                                                                                                                                      |                                                                                                                  |
| Chronic Kidney disease                    | 1Z12., 1Z13., 1Z14., 1Z15., 1Z16., 1Z1B.-1Z1L., K053., K054., K055., 1Z1T., 1Z1V., 1Z1W., 1Z1X., 1Z1Y., 1Z1Z., 1Z1a., 1Z1b., 1Z1c., 1Z1d., 1Z1e., 1Z1f., 1Z10., 1Z11., 1Z17.-1Z1A., K051., K052., 1Z1M., 1Z1Q., 1Z1N., 1Z1P., 1Z1R., 1Z1S. NOT(2126E)                                                                                                                       |                                                                                                                  |
| COPD                                      | H5832, H4640, H4641, Hyu30, Hyu31, H3., H31%, H32%, H36.-H3z., NOT(H3101, H31y0, H3122, H3y0., H3y1.                                                                                                                                                                                                                                                                        |                                                                                                                  |
| Depression                                | E0013, E0021, E118., E11y2, E11z2, E130, E135., E2003, E291., E2B., E2B1., Eu204, Eu251, Eu341, Eu412, E112%, E113%, Eu32%, Eu33%, NOT(Eu32a, Eu32B, Eu329, 212S.)                                                                                                                                                                                                          |                                                                                                                  |
| Epilepsy                                  | F1321, SC200, F25%, NOT(F2501, F2504, F2511, F2516, F25y4, F25G., F25H., 21260, 212J, F256%, F258.-F25A.)                                                                                                                                                                                                                                                                   |                                                                                                                  |
| Heart Failure                             | G58%, G1yz1, 662f.-662i.                                                                                                                                                                                                                                                                                                                                                    |                                                                                                                  |
| Peripheral Arterial Disease               | G73., Gyu74, G734., G73y., G73z%, NOT(G73z1)                                                                                                                                                                                                                                                                                                                                |                                                                                                                  |

|                      |                                                                                                                                                                        |  |
|----------------------|------------------------------------------------------------------------------------------------------------------------------------------------------------------------|--|
| Rheumatoid Arthritis | N041., N047., N04X., N04y0, N04y2, Nyu11, Nyu12, Nyu1G, Nyu10, G5yA., G5y8., N040%, N042%, NOT(N0420)                                                                  |  |
| Stroke               | G65.-G654., G656.-G65zz, G63y0.-G63y1,Gyu62-Gyu66, ZV12D, Fyu55, G6760, G6W., G6X., Gyu6F, Gyu6G, G61%, G64%, G66%, NOT(G617., G669.)                                  |  |
| Mental Health        | E1124, E1134, E11z., E11z0, E11zz, E2122, Eu323, Eu328, Eu333, Eu32A, Eu329, E114.-E117z, E10%, E110%, E111%, E11y%, E12%, E13%, Eu2%, Eu30%, Eu31%, NOT(E11y2, E135.) |  |
| Dementia             | F110 to F112, E02y1, E041., Eu041, F116.,F118., F21y2, A410., Eu107, F11x7, Eu02%, E00%, Eu01%, E012%, Eu00%, A411%                                                    |  |

**Box S2. List of codes used to derive primary care contacts**

|                                             | Read code v2                                                                                                                                                                               |
|---------------------------------------------|--------------------------------------------------------------------------------------------------------------------------------------------------------------------------------------------|
| Primary care practice face to face contacts | 9N1C., 9N1w., 9NF7., 9NF8., 9k27., 9N1G., 9NFB., 9NFW., 9N1t., 9N1x., 9NF5., 9NF4., 9NF6., 982B., 982C., 9N11., 9N12., 9N1c., 9N1y0, 9N1z., 9c0H., 9N01., 9N0G., 9N7B., 9NV., 9NY., 9NY0., |
| Primary care practice telephone contacts    | 9N31., 9b0m., 9b0n., 9b0o, 9N310, 9N310, 9N311, 9N3A, 8CAN., 8CAR0                                                                                                                         |
| Primary care practice failed contact        | 9N4., 9N41%, 9Ni..                                                                                                                                                                         |

**Box S3. List of codes used to derive contacts with other community care professionals**

|                           | Service description                                                                                                                                                                                                                                                                                                                                                                                                                                                                                                                                                                                                                                                                                                                                                                                                                                                                                                                                                                                                                                                                                                                                                                                                                                                                                                                                                                                                                                                                                                                                                                                                                                                                                                                                                                                                                                                                                                                       | Service reporting line                                                                                                                                                                                                                                                                                                                                                                                                                                                                                                                              |
|---------------------------|-------------------------------------------------------------------------------------------------------------------------------------------------------------------------------------------------------------------------------------------------------------------------------------------------------------------------------------------------------------------------------------------------------------------------------------------------------------------------------------------------------------------------------------------------------------------------------------------------------------------------------------------------------------------------------------------------------------------------------------------------------------------------------------------------------------------------------------------------------------------------------------------------------------------------------------------------------------------------------------------------------------------------------------------------------------------------------------------------------------------------------------------------------------------------------------------------------------------------------------------------------------------------------------------------------------------------------------------------------------------------------------------------------------------------------------------------------------------------------------------------------------------------------------------------------------------------------------------------------------------------------------------------------------------------------------------------------------------------------------------------------------------------------------------------------------------------------------------------------------------------------------------------------------------------------------------|-----------------------------------------------------------------------------------------------------------------------------------------------------------------------------------------------------------------------------------------------------------------------------------------------------------------------------------------------------------------------------------------------------------------------------------------------------------------------------------------------------------------------------------------------------|
| Community nurses contacts | District Nurse<br>District Nurse, Adult, Face to face<br>District Nurse, Adult, Non face to face<br>District Nurses<br>District Nursing Services: Adult<br>Cardiac Nursing / Liaison: Adult<br>Nurse<br>Nursing Services for Children<br>Other Specialist Nursing<br>Other Specialist Nursing, Adult, Face to face<br>Specialist Nursing - Asthma and Respiratory Nursing/Liaison<br>Specialist Nursing - Cardiac Nursing / Liaison<br>Specialist Nursing - Continence Services<br>Specialist Nursing - Diabetic Nursing / Liaison<br>Specialist Nursing - Parkinson's and Alzheimers Nursing/Liaison<br>Specialist Nursing - Tissue Viability Nursing/Liaison<br>Specialist Nursing - Tuberculosis Specialist Nursing<br>Specialist Nursing, Active Case Management (Community Matrons)<br>Specialist Nursing, Asthma and Respiratory Nursing/Liaison, Adult, Face to face<br>Specialist Nursing, Asthma and Respiratory Nursing/Liaison, Adult, Non face to face<br>Specialist Nursing, Cardiac Nursing/Liaison, Adult, Face to face<br>Specialist Nursing, Cardiac Nursing/Liaison, Adult, Non face to face<br>Specialist Nursing, Continence Services<br>"Specialist Nursing, Continence Services, Adult, Face to face<br>Specialist Nursing, Continence Services, Adult, Non face to face<br>Specialist Nursing, Diabetic Nursing/Liaison<br>Specialist Nursing, Diabetic Nursing/Liaison, Adult, Face to face<br>Specialist Nursing, Diabetic Nursing/Liaison, Adult, Non face to face<br>Specialist Nursing, Parkinson's and Alzheimers Nursing/Liaison<br>Specialist Nursing, Stoma Care Services, Adult, Face to face<br>Specialist Nursing, Tissue Viability Nursing/Liaison<br>Specialist Nursing, Tissue Viability Nursing/Liaison, Adult, Face to face<br>"Specialist Nursing, Tissue Viability Nursing/Liaison, Adult, Non face to face<br>Tissue Viability Nursing / Liaison: Adult<br>Tuberculosis Special Nursing: Adult | District Nursing<br>District Nursing (H&F, K&C, W)<br>District Nursing (H&F, K&C, W)<br>District Nursing – AWC<br>24 Hour Nursing<br>24 Hour Nursing (Phlebotomy)<br>Adult Nursing<br>CSCNS - Community Nursing<br>Children's Community Nursing<br>Community Matron<br>Community Matron (H&F, K&C, W)<br>Community Matrons<br>Community Matrons (H&F K&C W)<br>Community Nursing<br>Heart Failure Nursing<br>Heart Nurses (K&C)<br>Night Nursing<br>Night Nursing (K&C)<br>TB Nursing<br>Tissue Viability Nursing<br>Twilight/Night Nursing Service |

|                                         |                                                                                                                                                                                                                                                                                                                                                                                                                                                                                                                                                   |                                                                                                                                                                                                                                                                                                                                                                                                                                                                                                                                                                                                                                                                                                                                                                                                            |
|-----------------------------------------|---------------------------------------------------------------------------------------------------------------------------------------------------------------------------------------------------------------------------------------------------------------------------------------------------------------------------------------------------------------------------------------------------------------------------------------------------------------------------------------------------------------------------------------------------|------------------------------------------------------------------------------------------------------------------------------------------------------------------------------------------------------------------------------------------------------------------------------------------------------------------------------------------------------------------------------------------------------------------------------------------------------------------------------------------------------------------------------------------------------------------------------------------------------------------------------------------------------------------------------------------------------------------------------------------------------------------------------------------------------------|
| Palliative care community team contacts | Palliative / Respite Care: Adult<br>Specialist Nursing - Palliative / Respite Care<br>Specialist Nursing, Palliative/Respite Care, Adult, Face to face<br>Specialist Nursing, Palliative/Respite Care, Adult, Non face to face                                                                                                                                                                                                                                                                                                                    | Palliative Care<br>Palliative Care Service<br>Palliative Medicine (Consultant)<br>Pembridge Bereavement Counselling<br>Pembridge Community<br>Pembridge Day Care                                                                                                                                                                                                                                                                                                                                                                                                                                                                                                                                                                                                                                           |
| Rehabilitation teams contacts           | Community Rehabilitation Teams<br>Other Therapist, Adult, One to One<br>Physiotherapist<br>Physiotherapist, Adult, One to One<br>Physiotherapy<br>Physiotherapy Services: Adult<br>Rehabilitation for Other Disorders<br>Rehabilitation for Other Musculoskeletal Disorders<br>Rehabilitation for Other Neurological Disorders<br>Rehabilitation for Respiratory Disorders<br>SLT - Adult<br>Speech and Language Therapist, Adult, One to One<br>Speech and Language Therapy<br>Occupational Therapist, Adult, One to One<br>Occupational Therapy | Bedded Rehab – Therapists<br>Bedded Rehab - Therapists (H&F, K&C, W)<br>Brent Rehabilitation Service<br>Cardiac Rehabilitation<br>Claypond RehabTherapy<br>Community IFC MSK<br>Physiotherapy Service<br>Community MSK<br>Physiotherapy Service<br>Community Neuro Rehab<br>Community Neuro-Rehabilitation (H&F, K&C, W)<br>Community Recovery Service - Neuro Rehab<br>Community Rehab ICE<br>Community Rehabilitation<br>Community Rehabilitation (H&F, K&C, W)<br>EDTC - Community Physio<br>EHT Therapies<br>Ealing Hospital Therapies<br>Integrated Rehab<br>MSK Physiotherapy<br>Musculoskeletal Service<br>Musculoskeletal Service (W)<br>Physio (MSK)<br>Physiotherapy<br>Pulmonary Rehab<br>Short Term Rehabilitation<br>Therapies MS Physio<br>Adult SLT<br>SLT (Adults)<br>Occupational Therapy |

**Table S1. Sensitivity analysis for three or more hospital admissions in the last 90 days**

|                                                            | Model 1        |                | Model 2                          |                | Model 3                                                   |                | Model 4                                                                                                                             |                | Model 5                |                |
|------------------------------------------------------------|----------------|----------------|----------------------------------|----------------|-----------------------------------------------------------|----------------|-------------------------------------------------------------------------------------------------------------------------------------|----------------|------------------------|----------------|
|                                                            | Original Model |                | Model 1 without days in hospital |                | Model 1 including contacts with PC practice as continuous |                | Model 1 only for people with a record of cancer diagnosis and identification of palliative care needs in the last 12 months of life |                | Model 1 with ethnicity |                |
|                                                            | n=3472         |                | n=3472                           |                | n=3472                                                    |                | n=2703                                                                                                                              |                | n=2841                 |                |
|                                                            | RR             | 95% CI         | RR                               | 95% CI         | RR                                                        | 95% CI         | RR                                                                                                                                  | 95% CI         | RR                     | 95% CI         |
| Age                                                        | 0.98           | (0.97 to 0.99) | 0.98                             | (0.97 to 0.98) | 0.98                                                      | (0.97 to 0.98) | 0.98                                                                                                                                | (0.97 to 0.98) | 0.98                   | (0.97 to 0.99) |
| Gender (Male vs female)                                    | 1.10           | (0.92 to 1.31) | 1.11                             | (0.92 to 1.34) | 1.10                                                      | (0.92 to 1.02) | 1.05                                                                                                                                | (0.87 to 1.27) | 1.06                   | (0.88 to 1.28) |
| IMD quintile (Ref=1)                                       |                |                |                                  |                |                                                           |                |                                                                                                                                     |                |                        |                |
| 2                                                          | 0.82           | (0.65 to 1.03) | 0.87                             | (0.70 to 1.09) | 0.81                                                      | (0.65 to 1.02) | 0.87                                                                                                                                | (0.67 to 1.12) | 0.83                   | (0.65 to 1.05) |
| 3                                                          | 0.89           | (0.70 to 1.12) | 0.87                             | (0.67 to 1.12) | 0.88                                                      | (0.70 to 1.12) | 0.87                                                                                                                                | (0.66 to 1.13) | 0.83                   | (0.64 to 1.09) |
| 4                                                          | 0.96           | (0.75 to 1.24) | 0.90                             | (0.68 to 1.17) | 0.97                                                      | (0.75 to 1.24) | 1.01                                                                                                                                | (0.77 to 1.33) | 0.97                   | (0.73 to 1.30) |
| 5                                                          | 0.95           | (0.68 to 1.31) | 0.80                             | (0.58 to 1.11) | 0.93                                                      | (0.67 to 1.29) | 0.90                                                                                                                                | (0.62 to 1.30) | 0.85                   | (0.56 to 1.28) |
| Living in care home (Yes vs No)                            | 0.53           | (0.28 to 0.98) | 0.54                             | (0.29 to 0.98) | 0.52                                                      | (0.28 to 0.98) | 0.54                                                                                                                                | (0.28 to 1.05) | 0.64                   | (0.34 to 1.20) |
| Type of cancer (Ref=Bowel)                                 |                |                |                                  |                |                                                           |                |                                                                                                                                     |                |                        |                |
| Lung                                                       | 1.60           | (1.16 to 2.20) | 1.51                             | (1.10 to 2.09) | 1.61                                                      | (1.17 to 2.21) | 1.68                                                                                                                                | (1.17 to 2.41) | 1.63                   | (1.16 to 2.28) |
| Prostate                                                   | 1.57           | (1.07 to 2.30) | 1.81                             | (1.22 to 2.67) | 1.57                                                      | (1.07 to 2.30) | 1.55                                                                                                                                | (1.01 to 2.38) | 1.64                   | (1.08 to 2.51) |
| Breast                                                     | 1.24           | (0.82 to 1.87) | 1.33                             | (0.86 to 2.03) | 1.24                                                      | (0.82 to 1.87) | 1.27                                                                                                                                | (0.77 to 2.08) | 1.15                   | (0.71 to 1.84) |
| Pancreas                                                   | 1.39           | (0.93 to 2.08) | 1.33                             | (0.87 to 2.05) | 1.42                                                      | (0.95 to 2.13) | 1.51                                                                                                                                | (0.96 to 2.37) | 1.47                   | (0.95 to 2.28) |
| Haematological                                             | 1.23           | (0.73 to 2.07) | 1.82                             | (1.11 to 2.98) | 1.23                                                      | (0.73 to 2.08) | 1.19                                                                                                                                | (0.65 to 2.16) | 1.13                   | (0.62 to 2.05) |
| Other                                                      | 1.15           | (0.83 to 1.58) | 1.22                             | (0.87 to 1.69) | 1.15                                                      | (0.84 to 1.58) | 1.23                                                                                                                                | (0.86 to 1.78) | 1.19                   | (0.84 to 1.69) |
| Number of QoF comorbidities (Ref=0)                        |                |                |                                  |                |                                                           |                |                                                                                                                                     |                |                        |                |
| 1                                                          | 0.88           | (0.69 to 1.11) | 0.97                             | (0.75 to 1.25) | 0.87                                                      | (0.68 to 1.10) | 0.87                                                                                                                                | (0.67 to 1.13) | 0.88                   | (0.66 to 1.17) |
| 2                                                          | 0.99           | (0.76 to 1.30) | 1.08                             | (0.81 to 1.44) | 0.98                                                      | (0.75 to 1.29) | 0.96                                                                                                                                | (0.71 to 1.29) | 0.89                   | (0.65 to 1.20) |
| 3                                                          | 1.23           | (0.94 to 1.62) | 1.38                             | (1.04 to 1.83) | 1.24                                                      | (0.94 to 1.63) | 1.18                                                                                                                                | (0.87 to 1.60) | 1.14                   | (0.84 to 1.55) |
| >=4                                                        | 0.98           | (0.74 to 1.30) | 1.17                             | (0.88 to 1.57) | 0.97                                                      | (0.74 to 1.28) | 0.91                                                                                                                                | (0.66 to 1.25) | 0.91                   | (0.66 to 1.26) |
| Dementia (Yes vs No)                                       | 0.78           | (0.54 to 1.14) | 0.77                             | (0.53 to 1.13) | 0.79                                                      | (0.54 to 1.14) | 0.80                                                                                                                                | (0.51 to 1.27) | 0.76                   | (0.49 to 1.16) |
| Contacts with the primary care practice (Ref= 0 to 3)      |                |                |                                  |                |                                                           |                |                                                                                                                                     |                |                        |                |
| 4 to 10                                                    | 1.18           | (0.98 to 1.41) | 1.16                             | (0.97 to 1.39) |                                                           |                | 1.15                                                                                                                                | (0.94 to 1.39) | 1.20                   | (0.98 to 1.47) |
| >=11                                                       | 1.63           | (1.33 to 1.99) | 1.52                             | (1.23 to 1.88) |                                                           |                | 1.64                                                                                                                                | (1.32 to 2.04) | 1.77                   | (1.41 to 2.22) |
| Number of contacts with primary care practice (continuous) |                |                |                                  |                | 1.02                                                      | (1.01 to 1.03) |                                                                                                                                     |                |                        |                |
| Number of days in hospital in the last 90 days             | 1.04           | (1.03 to 1.04) |                                  |                | 1.04                                                      | (1.03 to 1.04) | 1.04                                                                                                                                | (1.03 to 1.04) | 1.04                   | (1.03 to 1.04) |
| Ethnicity (Ref= white)                                     |                |                |                                  |                |                                                           |                |                                                                                                                                     |                |                        |                |
| Black                                                      |                |                |                                  |                |                                                           |                |                                                                                                                                     |                | 1.11                   | (0.82 to 1.50) |
| Asian                                                      |                |                |                                  |                |                                                           |                |                                                                                                                                     |                | 1.52                   | (1.21 to 1.90) |
| Mixed                                                      |                |                |                                  |                |                                                           |                |                                                                                                                                     |                | 1.19                   | (0.93 to 1.51) |
| Other                                                      |                |                |                                  |                |                                                           |                |                                                                                                                                     |                | 1.08                   | (0.73 to 1.60) |

**Table S2. Sensitivity analysis for one or more hospital admissions in the last 30 days**

|                                                             | Model 1        |                | Model 2                          |                | Model 3                                                             |                | Model 4                                                                                                                        |                | Model 5                |                |
|-------------------------------------------------------------|----------------|----------------|----------------------------------|----------------|---------------------------------------------------------------------|----------------|--------------------------------------------------------------------------------------------------------------------------------|----------------|------------------------|----------------|
|                                                             | Original Model |                | Model 1 without days in hospital |                | Model 1 including contacts with primary care practice as continuous |                | Model 1 for people with a record of cancer diagnosis and identification of palliative care needs in the last 12 months of life |                | Model 1 with ethnicity |                |
|                                                             | n=3441         |                | n=3441                           |                | n=3441                                                              |                | n=2679                                                                                                                         |                | n=2815                 |                |
|                                                             | RR             | 95% CI         | RR                               | 95% CI         | RR                                                                  | 95% CI         | RR                                                                                                                             | 95% CI         | RR                     | 95% CI         |
| Age                                                         | 1.00           | (0.99 to 0.99) | 0.99                             | (0.99 to 1.00) | 1.00                                                                | (0.99 to 1.00) | 1.00                                                                                                                           | (0.99 to 1.00) | 1.00                   | (0.99 to 1.00) |
| Gender (Male vs female)                                     | 1.11           | (1.02 to 1.20) | 1.11                             | (1.02 to 1.21) | 1.11                                                                | (1.03 to 1.21) | 1.10                                                                                                                           | (1.00 to 1.20) | 1.08                   | (0.99 to 1.19) |
| IMD quintile (Ref=1)                                        |                |                |                                  |                |                                                                     |                |                                                                                                                                |                |                        |                |
| 2                                                           | 1.01           | (0.91 to 1.12) | 1.03                             | (0.92 to 1.14) | 1.01                                                                | (0.91 to 1.12) | 1.03                                                                                                                           | (0.92 to 1.16) | 1.05                   | (0.93 to 1.18) |
| 3                                                           | 1.03           | (0.92 to 1.15) | 1.02                             | (0.91 to 1.15) | 1.02                                                                | (0.92 to 1.14) | 1.06                                                                                                                           | (0.93 to 1.19) | 1.05                   | (0.92 to 1.17) |
| 4                                                           | 0.96           | (0.85 to 1.09) | 0.94                             | (0.82 to 1.07) | 0.96                                                                | (0.85 to 1.08) | 0.99                                                                                                                           | (0.86 to 1.13) | 0.95                   | (0.82 to 1.09) |
| 5                                                           | 1.06           | (0.90 to 1.25) | 1.02                             | (0.86 to 1.20) | 1.06                                                                | (0.90 to 1.26) | 1.08                                                                                                                           | (0.91 to 1.28) | 1.06                   | (0.86 to 1.29) |
| Living in care home (Yes vs no)                             | 0.54           | (0.41 to 0.72) | 0.54                             | (0.40 to 0.71) | 0.54                                                                | (0.41 to 0.73) | 0.58                                                                                                                           | (0.43 to 0.79) | 0.58                   | (0.44 to 0.80) |
| Type of cancer (Ref=Bowel)                                  |                |                |                                  |                |                                                                     |                |                                                                                                                                |                |                        |                |
| Lung                                                        | 1.09           | (0.96 to 2.23) | 1.06                             | (0.93 to 1.21) | 1.08                                                                | (0.95 to 1.23) | 1.06                                                                                                                           | (0.91 to 1.23) | 1.06                   | (0.92 to 1.22) |
| Prostate                                                    | 0.98           | (0.84 to 2.15) | 1.04                             | (0.89 to 1.22) | 0.98                                                                | (0.83 to 1.14) | 0.94                                                                                                                           | (0.78 to 1.14) | 1.05                   | (0.87 to 1.24) |
| Breast                                                      | 1.19           | (1.02 to 1.39) | 1.21                             | (1.03 to 1.43) | 1.18                                                                | (1.01 to 1.38) | 1.22                                                                                                                           | (1.02 to 1.47) | 1.17                   | (0.96 to 1.40) |
| Pancreas                                                    | 1.02           | (0.87 to 2.20) | 1.01                             | (0.85 to 1.20) | 1.03                                                                | (0.87 to 1.21) | 1.05                                                                                                                           | (0.88 to 1.25) | 1.07                   | (0.90 to 1.29) |
| Haematological                                              | 0.91           | (0.72 to 2.15) | 1.04                             | (0.83 to 1.31) | 0.91                                                                | (0.71 to 1.15) | 0.85                                                                                                                           | (0.65 to 1.11) | 0.94                   | (0.73 to 1.21) |
| Other                                                       | 0.96           | (0.86 to 1.08) | 0.98                             | (0.87 to 1.11) | 0.96                                                                | (0.85 to 1.08) | 0.94                                                                                                                           | (0.82 to 1.07) | 1.00                   | (0.87 to 1.14) |
| Number of QoF comorbidities (Ref=0)                         |                |                |                                  |                |                                                                     |                |                                                                                                                                |                |                        |                |
| 1                                                           | 0.92           | (0.83 to 1.02) | 0.96                             | (0.86 to 1.07) | 0.92                                                                | (0.83 to 1.02) | 0.93                                                                                                                           | (0.83 to 1.05) | 0.93                   | (0.81 to 1.05) |
| 2                                                           | 1.06           | (0.95 to 1.18) | 1.10                             | (0.98 to 1.23) | 1.06                                                                | (0.95 to 1.18) | 1.12                                                                                                                           | (1.00 to 1.26) | 1.02                   | (0.89 to 1.16) |
| 3                                                           | 0.99           | (0.87 to 1.12) | 1.03                             | (0.91 to 1.18) | 0.98                                                                | (0.87 to 1.11) | 0.98                                                                                                                           | (0.85 to 1.13) | 0.99                   | (0.84 to 1.14) |
| >=4                                                         | 1.11           | (0.97 to 1.27) | 1.19                             | (1.04 to 1.36) | 1.10                                                                | (0.96 to 1.26) | 1.11                                                                                                                           | (0.94 to 1.30) | 1.07                   | (0.92 to 1.24) |
| Dementia (Yes vs No)                                        | 0.94           | (0.82 to 1.07) | 0.91                             | (0.80 to 1.05) | 0.93                                                                | (0.82 to 1.07) | 0.91                                                                                                                           | (0.78 to 1.06) | 0.95                   | (0.81 to 1.09) |
| COPD (Yes vs No)                                            | 1.07           | (0.97 to 1.19) | 1.05                             | (0.95 to 1.17) | 1.07                                                                | (0.97 to 1.18) | 1.08                                                                                                                           | (0.96 to 1.20) | 1.11                   | (0.98 to 1.25) |
| Contacts with community nurses (Ref= 0 to 3)                |                |                |                                  |                |                                                                     |                |                                                                                                                                |                |                        |                |
| 4 to 12                                                     | 1.06           | (0.98 to 1.15) | 1.05                             | (0.97 to 1.14) |                                                                     |                | 1.07                                                                                                                           | (0.98 to 1.18) | 1.03                   | (0.94 to 1.14) |
| >=13                                                        | 0.88           | (0.90 to 0.98) | 0.85                             | (0.76 to 0.95) |                                                                     |                | 0.88                                                                                                                           | (0.78 to 0.98) | 0.84                   | (0.76 to 0.92) |
| Contacts with community palliative care teams (Ref= 0 to 3) |                |                |                                  |                |                                                                     |                |                                                                                                                                |                |                        |                |
| 4 to 8                                                      | 0.95           | (0.82 to 1.08) | 0.91                             | (0.80 to 1.04) |                                                                     |                | 0.94                                                                                                                           | (0.81 to 1.09) | 0.90                   | (0.77 to 1.06) |
| >=9                                                         | 0.85           | (0.69 to 1.04) | 0.79                             | (0.63 to 0.99) |                                                                     |                | 0.92                                                                                                                           | (0.74 to 1.14) | 0.89                   | (0.70 to 1.12) |
| Days in hospital in the last 90 days                        | 1.02           | (1.01 to 1.02) |                                  |                | 1.02                                                                | (1.01 to 1.02) | 1.01                                                                                                                           | (1.01 to 1.02) | 1.02                   | (1.01 to 1.02) |
| Contacts with community nurses (Continuous)                 |                |                |                                  |                | 1.00                                                                | (0.99 to 1.00) |                                                                                                                                |                |                        |                |
| Contacts with community palliative care teams (Continuous)  |                |                |                                  |                | 0.99                                                                | (0.97 to 1.00) |                                                                                                                                |                |                        |                |
| Ethnicity (Ref= white)                                      |                |                |                                  |                |                                                                     |                |                                                                                                                                |                |                        |                |
| Black                                                       |                |                |                                  |                |                                                                     |                |                                                                                                                                |                | 1.12                   | (0.97 to 1.31) |
| Asian                                                       |                |                |                                  |                |                                                                     |                |                                                                                                                                |                | 1.17                   | (1.06 to 1.30) |
| Mixed                                                       |                |                |                                  |                |                                                                     |                |                                                                                                                                |                | 1.14                   | (1.03 to 1.28) |
| Other                                                       |                |                |                                  |                |                                                                     |                |                                                                                                                                |                | 0.91                   | (0.76 to 1.09) |

**Table S3. Sensitivity analysis for one or more ED visits in the last 2 weeks of life**

|                                                             | Model 1        |                | Model 2                          |                | Model 3                                                   |                | Model 5                                                                                                                        |                | Model 5                |                |
|-------------------------------------------------------------|----------------|----------------|----------------------------------|----------------|-----------------------------------------------------------|----------------|--------------------------------------------------------------------------------------------------------------------------------|----------------|------------------------|----------------|
|                                                             | Original Model |                | Model 1 without days in hospital |                | Model 1 including contacts with PC practice as continuous |                | Model 1 for people with a record of cancer diagnosis and identification of palliative care needs in the last 12 months of life |                | Model 1 with ethnicity |                |
|                                                             | n=3441         |                | n=3441                           |                | n=3441                                                    |                | n=2679                                                                                                                         |                | n=2815                 |                |
|                                                             | RR             | 95% CI         | RR                               | 95% CI         | RR                                                        | 95% CI         | RR                                                                                                                             | 95% CI         | RR                     | 95% CI         |
| Age                                                         | 0.99           | (0.99 to 0.99) | 0.99                             | (0.99 to 1.00) | 0.99                                                      | (0.99 to 1.00) | 0.99                                                                                                                           | (0.99 to 1.00) | 0.99                   | (0.99 to 1.00) |
| Gender (Male vs female)                                     | 1.10           | (0.98 to 1.23) | 1.10                             | (0.98 to 1.23) | 1.10                                                      | (0.98 to 1.23) | 1.02                                                                                                                           | (0.89 to 1.17) | 1.09                   | (0.96 to 1.24) |
| IMD quintile (Ref=1)                                        |                |                |                                  |                |                                                           |                |                                                                                                                                |                |                        |                |
| 2                                                           | 1.01           | (0.89 to 1.15) | 1.01                             | (0.89 to 1.15) | 1.00                                                      | (0.88 to 1.15) | 1.03                                                                                                                           | (0.88 to 1.20) | 1.03                   | (0.88 to 1.21) |
| 3                                                           | 0.93           | (0.80 to 1.15) | 0.93                             | (0.79 to 1.09) | 0.93                                                      | (0.79 to 1.08) | 0.91                                                                                                                           | (0.75 to 1.10) | 0.94                   | (0.79 to 1.13) |
| 4                                                           | 1.00           | (0.84 to 1.18) | 0.99                             | (0.83 to 1.17) | 1.00                                                      | (0.84 to 1.18) | 0.99                                                                                                                           | (0.81 to 1.22) | 0.97                   | (0.79 to 1.18) |
| 5                                                           | 0.99           | (0.79 to 1.22) | 0.97                             | (0.78 to 1.21) | 0.98                                                      | (0.78 to 1.19) | 1.03                                                                                                                           | (0.81 to 1.30) | 0.93                   | (0.70 to 1.23) |
| Living in care home (Yes vs no)                             | 0.70           | (0.49 to 0.99) | 0.69                             | (0.49 to 0.98) | 0.70                                                      | (0.49 to 1.19) | 0.71                                                                                                                           | (0.49 to 1.02) | 0.76                   | (0.51 to 1.13) |
| Type of cancer (Ref=Bowel)                                  |                |                |                                  |                |                                                           |                |                                                                                                                                |                |                        |                |
| Lung                                                        | 1.01           | (0.85 to 1.19) | 1.00                             | (0.84 to 1.19) | 1.01                                                      | (0.85 to 1.20) | 1.03                                                                                                                           | (0.85 to 1.26) | 0.99                   | (0.82 to 1.21) |
| Prostate                                                    | 0.89           | (0.72 to 1.10) | 0.90                             | (0.73 to 1.11) | 0.89                                                      | (0.72 to 1.09) | 0.92                                                                                                                           | (0.71 to 1.19) | 0.91                   | (0.71 to 1.16) |
| Breast                                                      | 1.16           | (0.94 to 1.42) | 1.17                             | (0.95 to 1.43) | 1.16                                                      | (0.94 to 1.42) | 1.19                                                                                                                           | (0.92 to 1.52) | 1.14                   | (0.90 to 1.44) |
| Pancreas                                                    | 0.82           | (0.63 to 1.06) | 0.82                             | (0.63 to 1.06) | 0.82                                                      | (0.63 to 1.06) | 0.80                                                                                                                           | (0.60 to 1.07) | 0.83                   | (0.63 to 1.11) |
| Haematological                                              | 0.93           | (0.68 to 1.26) | 0.97                             | (0.71 to 1.31) | 0.94                                                      | (0.69 to 1.27) | 0.84                                                                                                                           | (0.57 to 1.24) | 0.90                   | (0.63 to 1.27) |
| Other                                                       | 0.82           | (0.70 to 0.96) | 0.83                             | (0.71 to 0.96) | 0.83                                                      | (0.71 to 0.96) | 0.84                                                                                                                           | (0.69 to 1.01) | 0.84                   | (0.70 to 1.00) |
| Number of QoF comorbidities (Ref=0)                         |                |                |                                  |                |                                                           |                |                                                                                                                                |                |                        |                |
| 1                                                           | 0.88           | (0.75 to 1.04) | 0.89                             | (0.75 to 1.05) | 0.88                                                      | (0.74 to 1.03) | 0.94                                                                                                                           | (0.78 to 1.13) | 0.88                   | (0.73 to 1.06) |
| 2                                                           | 1.05           | (0.89 to 1.25) | 1.06                             | (0.89 to 1.26) | 1.05                                                      | (0.89 to 1.25) | 1.08                                                                                                                           | (0.89 to 1.31) | 0.95                   | (0.78 to 1.16) |
| 3                                                           | 1.01           | (0.84 to 1.21) | 1.02                             | (0.85 to 1.23) | 1.01                                                      | (0.84 to 1.22) | 1.03                                                                                                                           | (0.83 to 1.28) | 0.97                   | (0.79 to 1.20) |
| >=4                                                         | 1.09           | (0.89 to 1.32) | 1.10                             | (0.90 to 1.34) | 1.09                                                      | (0.89 to 1.32) | 1.11                                                                                                                           | (0.88 to 1.39) | 1.04                   | (0.83 to 1.30) |
| Chronic Heart Disease (yes vs no)                           | 1.14           | (0.99 to 1.31) | 1.14                             | (1.00 to 1.31) | 1.13                                                      | (0.99 to 1.30) | 1.13                                                                                                                           | (0.97 to 1.31) | 1.16                   | (1.00 to 1.34) |
| Contacts with the primary care practice (Ref= 0 to 3)       |                |                |                                  |                |                                                           |                |                                                                                                                                |                |                        |                |
| 4 to 10                                                     | 1.10           | (0.98 to 1.22) | 1.10                             | (0.98 to 1.22) |                                                           |                | 1.13                                                                                                                           | (1.00 to 1.27) | 1.17                   | (1.04 to 1.31) |
| >=11                                                        | 1.27           | (1.10 to 1.47) | 1.27                             | (1.10 to 1.47) |                                                           |                | 1.35                                                                                                                           | (1.15 to 1.57) | 1.35                   | (1.14 to 1.60) |
| Contacts with community nurses (Ref= 0 to 3)                |                |                |                                  |                |                                                           |                |                                                                                                                                |                |                        |                |
| 4 to 12                                                     | 0.96           | (0.85 to 1.08) | 0.96                             | (0.85 to 1.08) |                                                           |                | 0.92                                                                                                                           | (0.80 to 1.06) | 0.99                   | (0.87 to 1.14) |
| >=13                                                        | 0.79           | (0.68 to 0.92) | 0.78                             | (0.67 to 0.91) |                                                           |                | 0.80                                                                                                                           | (0.68 to 0.93) | 0.74                   | (0.62 to 0.87) |
| Contacts with community palliative care teams (Ref= 0 to 3) |                |                |                                  |                |                                                           |                |                                                                                                                                |                |                        |                |
| 4 to 8                                                      | 1.01           | (0.85 to 1.21) | 1.00                             | (0.84 to 1.20) |                                                           |                | 1.01                                                                                                                           | (0.81 to 1.26) | 0.91                   | (0.72 to 1.15) |
| >=9                                                         | 0.78           | (0.56 to 1.08) | 0.76                             | (0.55 to 1.06) |                                                           |                | 0.90                                                                                                                           | (0.66 to 1.24) | 0.75                   | (0.49 to 1.12) |
| Days in hospital in the last 90 days                        | 1.00           | (1.00 to 1.01) |                                  |                | 1.00                                                      | (1.00 to 1.00) | 1.00                                                                                                                           | (1.00 to 1.01) | 1.00                   | (1.00 to 1.01) |
| Contacts with primary care practice (continuous)            |                |                |                                  |                | 1.01                                                      | (1.01 to 1.01) |                                                                                                                                |                |                        |                |
| Contacts with community nurses (Continuous)                 |                |                |                                  |                | 0.99                                                      | (0.99 to 0.99) |                                                                                                                                |                |                        |                |
| Contacts with community palliative care teams (Continuous)  |                |                |                                  |                | 0.99                                                      | (0.97 to 1.01) |                                                                                                                                |                |                        |                |
| Ethnicity (Ref= white)                                      |                |                |                                  |                |                                                           |                |                                                                                                                                |                |                        |                |
| Black                                                       |                |                |                                  |                |                                                           |                |                                                                                                                                |                | 1.28                   | (1.05 to 1.55) |



|  |       |  |  |  |  |      |                |
|--|-------|--|--|--|--|------|----------------|
|  | Asian |  |  |  |  | 1.29 | (1.11 to 1.50) |
|  | Mixed |  |  |  |  | 0.99 | (0.84 to 1.17) |
|  | Other |  |  |  |  | 1.00 | (0.76 to 1.29) |
